1 **SARS-CoV-2 variant B.1.617 is resistant to Bamlanivimab and evades**  
2 **antibodies induced by infection and vaccination**

3

4 Markus Hoffmann,<sup>1,2,6,\*</sup> Heike Hofmann-Winkler,<sup>1,6</sup> Nadine Krüger,<sup>1,6</sup> Amy Kempf,<sup>1,2</sup>

5 Inga Nehlmeier,<sup>1</sup> Luise Graichen,<sup>1,2</sup> Anzhalika Sidarovich,<sup>1,2</sup> Anna-Sophie Moldenhauer,<sup>1</sup>

6 Martin S. Winkler,<sup>3</sup> Sebastian Schulz,<sup>4</sup> Hans-Martin Jäck,<sup>4</sup> Metodi V. Stankov,<sup>5</sup>

7 Georg M. N. Behrens,<sup>5</sup> Stefan Pöhlmann<sup>1,2,\*</sup>

8

9 <sup>1</sup>Infection Biology Unit, German Primate Center, Kellnerweg 4, 37077 Göttingen, Germany

10 <sup>2</sup>Faculty of Biology and Psychology, Georg-August-University Göttingen, Wilhelmsplatz 1,  
11 37073 Göttingen, Germany

12 <sup>3</sup>Department of Anaesthesiology, University of Göttingen Medical Center, Göttingen, Georg-  
13 August University of Göttingen, Robert-Koch-Straße 40, 37075 Göttingen, Germany

14 <sup>4</sup>Division of Molecular Immunology, Department of Internal Medicine 3, Friedrich-Alexander  
15 University of Erlangen-Nürnberg, Glückstraße 6, 91054 Erlangen, Germany

16 <sup>5</sup> Department for Rheumatology and Immunology, Hannover Medical School, Carl-Neuberg-Str.  
17 1, 30625 Hannover, Germany

18

19 <sup>6</sup>These authors contributed equally

20 <sup>7</sup>Lead contact

21 \*Correspondence: mhoffmann@dpz.eu (M.H.), spoehlmann@dpz.eu (S.P.)

22

23

24

25 **SUMMARY**

26 **The emergence of SARS-CoV-2 variants threatens efforts to contain the COVID-19**  
27 **pandemic. The number of COVID-19 cases and deaths in India has risen steeply in recent**  
28 **weeks and a novel SARS-CoV-2 variant, B.1.617, is believed to be responsible for many of**  
29 **these cases. The spike protein of B.1.617 harbors two mutations in the receptor binding**  
30 **domain, which interacts with the ACE2 receptor and constitutes the main target of**  
31 **neutralizing antibodies. Therefore, we analyzed whether B.1.617 is more adept in entering**  
32 **cells and/or evades antibody responses. B.1.617 entered two out of eight cell lines tested**  
33 **with slightly increased efficiency and was blocked by entry inhibitors. In contrast, B.1.617**  
34 **was resistant against Bamlanivimab, an antibody used for COVID-19 treatment. Finally,**  
35 **B.1.617 evaded antibodies induced by infection or vaccination, although with moderate**  
36 **efficiency. Collectively, our study reveals that antibody evasion of B.1.617 may contribute to**  
37 **the rapid spread of this variant.**

38

39

40

41

42

43

44

45

46

47

48

## 49 INTRODUCTION

50 The severe acute respiratory syndrome coronavirus 2 (SARS-CoV-2) is the causative agent of the  
51 devastating coronavirus disease 2019 (COVID-19) pandemic, which more than one year after its  
52 emergence is associated with record numbers in cases and deaths (W.H.O., 2021). Effective  
53 antivirals are largely lacking, although recombinant antibodies targeting the viral spike protein  
54 (S) can significantly reduce viral load and have received emergency use authorization (EUA)  
55 (Chen et al., 2021a; Gottlieb et al., 2021). Drugs that target the dysregulated cytokine responses  
56 characteristic for COVID-19 are available but their clinical benefit is overseer-able (Tomazini et  
57 al., 2020; W.H.O. REACT Working Group et al., 2020). While progress in treatment  
58 development is moderate, mRNA- and vector-based vaccines are available that provide efficient  
59 protection against disease (Baden et al., 2021; Polack et al., 2020). As a consequence, vaccination  
60 is viewed as the key instrument in combating and ultimately ending the COVID-19 pandemic.

61 Strategies to fight the COVID-19 pandemic either by vaccines or non-pharmaceutical  
62 interventions have been threatened by the emergence of SARS-CoV-2 variants of concern  
63 (VOC). These variants harbor mutations that confer increased transmissibility or immune evasion  
64 (Plante et al., 2021). Studies of mutations present in VOC have mainly focused on the viral S  
65 protein. The S protein is incorporated into the viral membrane and facilitates viral entry into  
66 target cells. For this, the surface unit, S1, of the S protein first binds to the cellular receptor ACE2  
67 (Hoffmann et al., 2020; Zhou et al., 2020) via its receptor binding domain (RBD). Subsequently,  
68 the S protein is activated by TMPRSS2 or related cellular proteases (Hoffmann et al., 2021b;  
69 Hoffmann et al., 2020) and the transmembrane unit, S2, of the S protein facilitates fusion of the  
70 viral and a cellular membrane, allowing delivery of the viral genome into the host cell. These  
71 processes are essential for SARS-CoV-2 infection and are targeted by drugs and neutralizing  
72 antibodies.

73           The prototypic VOC with increased fitness is variant B.1.1.7, which emerged in the  
74 United Kingdom and is now spreading in many countries. B.1.1.7 replicates to higher levels in  
75 patients and is more efficiently transmitted between humans as compared to the previously  
76 circulating viruses (Frampton et al., 2021; Graham et al., 2021; Leung et al., 2021). The increased  
77 transmissibility might be linked to mutation N501Y in the RBD that might increase binding to  
78 ACE2 (Ali et al., 2021; Luan et al., 2021). However, the exact mechanisms underlying more  
79 robust transmission of B.1.1.7 remain to be elucidated. In contrast, differences in antibody-  
80 mediated neutralization between previously circulating viruses and variant B.1.1.7 are minor,  
81 with B.1.1.7 being slightly less sensitive to neutralization (Chen et al., 2021b; Collier et al., 2021;  
82 Hoffmann et al., 2021a; Kuzmina et al., 2021; Muik et al., 2021; Planas et al., 2021; Shen et al.,  
83 2021; Supasa et al., 2021; Wang et al., 2021a; Xie et al., 2021). In sum, B.1.1.7 shows increased  
84 fitness and will outcompete previously circulating viruses in an immunologically naïve  
85 population.

86           In populations with a high percentage of individuals with pre-existing immune responses  
87 against SARS-CoV-2, viral variants that can evade immune control have a selective advantage.  
88 Variant B.1.351 that became dominant in South Africa (Tegally et al., 2021) and variant P.1 that  
89 became dominant in Brazil (Faria et al., 2021) are such variants (Chen et al., 2021b; Dejnirattisai  
90 et al., 2021; Edara et al., 2021; Garcia-Beltran et al., 2021; Hoffmann et al., 2021a; Kuzmina et  
91 al., 2021; Planas et al., 2021; Wang et al., 2021a; Zhou et al., 2021). These variants harbor  
92 mutations in the S protein that reduce neutralization by antibodies, including E484K, which is  
93 located in the RBD and is present in both, B.1.351 and P1 (Li et al., 2021; Liu et al., 2021; Wang  
94 et al., 2021c). At present, evasion from antibodies is most prominent for variant B.1.351 but it is  
95 unclear whether variants can arise that exhibit increased or even complete neutralization  
96 resistance.

97           India has seen a steep increase in COVID-19 cases and deaths in the recent weeks  
98 (W.H.O., 2021). It is believed that many cases are due to infection with a novel variant, B.1.617,  
99 that harbors eight mutations in the S protein, including mutations L452R and E484Q within the  
100 RBD, which introduce changes at amino acid positions known to modulate antibody-mediated  
101 neutralization (Li et al., 2021; Li et al., 2020). However, it is at present unknown whether  
102 B.1.617 evades antibody-mediated neutralization. Similarly, it is unknown whether the variant  
103 exhibits an altered dependence on host cell factors for entry, which may alter cell tropism, entry  
104 efficiency and sensitivity to entry inhibitors.

105           Here, we report that the S protein of B.1.617 mediates moderately enhanced entry into the  
106 human lung- and intestine-derived cell lines Calu-3 and Caco-2, respectively, and that entry is  
107 inhibited by soluble ACE2 and Camostat, the latter of which targets TMPRSS2. In contrast, entry  
108 driven by the B.1.617 S protein was fully resistant to neutralization by a monoclonal antibody  
109 with EUA for COVID-19 treatment (Bamlanivimab). Finally, B.1.617 S protein-driven entry was  
110 partially resistant against neutralization by antibodies elicited upon infection or vaccination with  
111 the Comirnaty/BNT162b2 vaccine.

112

113

114

115

116

117

118

119

120

121 **RESULTS**

122

123 **The S protein of variant B.1.617 mediates increased entry into certain human intestinal and**  
124 **lung cell lines**

125 The S protein of SARS-CoV-2 variant B.1.617 (GISAID Accession ID: PI\_ISL\_1360382)  
126 harbors a total of eight mutations compared to the S proteins of the viruses sampled at the start of  
127 the pandemic (Figure 1). Seven mutations are located within the S1 subunit, three of which are  
128 present in the N-terminal domain (R21T, E154K, Q218H), two in the RBD (L452R, E484Q) and  
129 two between the RBD and the S1/S2 border (D614G, P681R). One additional mutation is located  
130 within the S2 subunit (H1101D) (Figure 1). Since the rapid spread of variant B.1.617 in India  
131 might be due to an increased ability to enter cells or to infect a broader range of target cells, we  
132 analyzed the cell tropism and entry efficiency of variant B.1.617. For this, we employed vesicular  
133 stomatitis virus (VSV) particles pseudotyped with the S protein of either wildtype (WT) SARS-  
134 CoV-2 (Wuhan-1 isolate with D614G exchange) or variants B.1.617 or B.1.351. These  
135 pseudotyped particles faithfully mimic cell entry of SARS-CoV-2 and have been previously used  
136 to identify host factors required for SARS-CoV-2 cell entry and to study neutralization of SARS-  
137 CoV-2 by antibodies (Hoffmann et al., 2021a; Hoffmann et al., 2020; Riepler et al., 2020;  
138 Schmidt et al., 2020).

139 We analyzed a total of eight cell lines - Vero, Caco-2, Calu-3, Calu-3 (ACE2), 293T,  
140 A549 (ACE2), A549 (ACE2+TMPRSS2) and Huh-7 - most of which are commonly used as cell  
141 culture models for various aspects of SARS-CoV-2 replication. Calu-3 (ACE2), A549 (ACE2)  
142 and A549 (ACE2+TMPRSS2) cells were engineered to express ACE2 or ACE2 in conjunction  
143 with TMPRSS2.

144 For most cell lines we did not observe significant differences in cell entry efficiency  
145 between the WT and variant S proteins (Figure 2A and Figure S1). The only exceptions were  
146 Caco-2 and Calu-3 cells (and 293T cells in case of B.1.351), which are derived from human  
147 intestine and lung, respectively, and for which the S protein of B.1.617 (and B.1.351) mediated  
148 entry with moderately increased efficiency (Figure 2A and Figure S1). Of note this increase was  
149 less prominent when Calu-3 cells were engineered to overexpress ACE2. In addition, we  
150 investigated S protein-driven cell entry into BHK-21 cells, which were transfected either with  
151 empty plasmid or ACE2 expression plasmid. As expected, BHK-21 cells transfected with empty  
152 plasmid did not allow entry driven by any of the S proteins tested but were efficiently entered by  
153 particles bearing the VSV glycoprotein (VSV-G) (Figure 2B). In contrast, directed ACE2  
154 expression rendered these cells susceptible to S protein-driven entry and entry efficiency was  
155 comparable between WT, B.1.351 and B.1.617 S proteins (Figure 2B). In sum, we demonstrate  
156 that the S protein of SARS-CoV-2 B.1.617 allows for moderately enhanced entry into certain  
157 cells of the respiratory and digestive tracts.

158

### 159 **Soluble ACE2 and Camostat inhibit cell entry driven by the S protein of variant B.1.617**

160 We next examined whether entry of B.1.617 can be blocked by inhibitors targeting the RBD  
161 (soluble ACE2) and proteolytic activation (Camostat) of the S protein. Soluble ACE2 binds to the  
162 RBD and blocks subsequent engagement of membrane bound ACE2. It inhibits SARS-CoV and  
163 SARS-CoV-2 cell entry and is being developed for COVID-19 treatment (Kuba et al., 2005;  
164 Monteil et al., 2020). Soluble ACE2 blocked Caco-2 cell entry driven by WT, B.1.351 and  
165 B.1.617 S proteins with comparable efficiency but did not interfere with entry driven by VSV-G  
166 (Figure 3A). Similar results were obtained for Camostat, a clinically-proven serine protease

167 inhibitor active against TMPRSS2 (Hoffmann et al., 2020) (Figure 3B). These results indicate  
168 that soluble ACE2 and Camostat will be active against the B.1617 variant.

169

170 **Resistance against the therapeutic antibody Bamlanivimab.**

171 The neutralizing monoclonal antibodies Casirivimab (REGN10933), Imdevimab (REGN10987)  
172 and Bamlanivimab (LY-CoV555) and Etesevimab (LY-CoV016) (Figure S2) have received EUA  
173 for COVID-19 therapy. We analyzed whether these antibodies were able to inhibit host cell entry  
174 driven by the S protein of variant B.1.617. An irrelevant control antibody (hIgG) failed to block  
175 entry mediated by all viral glycoproteins tested (Figure 4), as expected. Casirivimab inhibited  
176 host cell entry mediated by the S protein of B.1.351 with reduced efficiency, in keeping with  
177 published data (Hoffmann et al., 2021a), and also inhibition of B.1.617 S protein-driven entry  
178 was diminished (Figure 4), in keeping with the presence of mutations in the antibody binding site  
179 (Figure S2). In contrast, B.1.351 and B.1.617 S protein-mediated entry was efficiently inhibited  
180 by Imdevimab and by a cocktail of Casirivimab and Imdevimab, termed REGN-COV (Figure 4).  
181 Further, Bamlanivimab failed to inhibit entry driven by the S protein of variant B.1.351, as  
182 expected (Hoffmann et al., 2021a), and was also unable to block entry driven by the S protein of  
183 variant B.1.617 (Figure 4). Bamlanivimab resistance of B.1.617 is in agreement with mutations in  
184 the epitope recognized by the antibody (Figure S2). Etesevimab blocked entry driven by WT and  
185 B.1.617 S proteins with comparable efficiency but failed to inhibit B.1.351 S protein-driven cell  
186 entry (Figure 4). Finally, a cocktail of Bamlanivimab and Etesevimab was less effective in  
187 inhibiting B.1.617 S protein-driven cell entry compared to WT SARS-CoV-2 S and completely  
188 failed to block entry driven by B.1.351 S (Figure 4). These results suggest that Casirivimab and  
189 particularly Bamlanivimab monotherapy may not be suitable for treatment of patients infected  
190 with variant B1.617.



191

192 **Diminished neutralization by plasma from COVID-19 convalescent patients**

193 SARS-CoV-2 infection induces the generation of neutralizing antibodies in most infected patients  
194 and it is believed that these antibody responses are important for protection from re-infection  
195 (Rodda et al., 2021; Wajnberg et al., 2020). Therefore, we determined whether variant B.1.617  
196 evades inhibition by antibodies, which might contribute to its increasing transmission dynamics.  
197 For this, we analyzed antibody-mediated neutralization using plasma samples obtained from 15  
198 COVID-19 patients at the intensive care unit of Göttingen University Hospital (Table S1). These  
199 plasma samples were prescreened for neutralizing activity and tested for their ability to block  
200 host cell entry driven by WT S protein and the S protein of variant B.1.617. The S protein of  
201 variant B.1.351 served as control since this S protein efficiently evades antibody-mediated  
202 neutralization (Hoffmann et al., 2021a). Inhibition of entry driven by the B.1.351 S protein was  
203 almost 6-fold less efficient as compared to WT S protein (Figure 5A and Figure S3A).  
204 Neutralization of particles bearing the S protein of variant B.1.617 was also reduced but the  
205 reduction was less prominent (~ 2-fold) (Figure 5A and Figure S3A). These results suggest that  
206 variant B.1.617 might evade antibody-mediated control in COVID-19 convalescent patients,  
207 although with moderate efficiency.

208

209 **Diminished neutralization by plasma from Comirnaty/BNT162b2 vaccinated patients**

210 Vaccination with Comirnaty/BNT162b2 has been shown to be safe and to protect against  
211 COVID-19 with high efficiency (Polack et al., 2020). The vaccine is based on an mRNA that  
212 encodes the SARS-CoV-2 S protein. The vaccine induces antibody and T cell responses (Grifoni  
213 et al., 2020; Peng et al., 2020) and the neutralizing antibodies triggered by vaccination are  
214 believed to be important for vaccine-induced protection against SARS-CoV-2 infection.

215 Therefore, we analyzed whether cell entry driven by the S protein of variant B.1.617 can be  
216 efficiently inhibited by plasma from Comirnaty/BNT162b2 vaccinated individuals (Table S2). To  
217 address this question, we analyzed neutralization by 15 plasma samples obtained from vaccinees  
218 two to three weeks after they had received the second vaccine dose. All sera efficiently inhibited  
219 entry driven by WT S protein (Figure 5B and Figure S3B). Inhibition of entry driven by B.1.351  
220 S protein was more than 11-fold reduced as compared to WT (Figure 5B), in keeping with  
221 expectations (Hoffmann et al., 2021a). Entry mediated by the S protein of variant B.1.617 was  
222 also less efficiently inhibited but evasion from antibody-mediated inhibition was less pronounced  
223 (~ 3-fold reduction) (Figure 5B). Thus, variant B.1.617 can partially evade control by antibodies  
224 induced by vaccination with Comirnaty/BNT162b2.

225

226

227

228

229

230

231

232

233

234

235

236

237

238

239 **DISCUSSION**

240 The recent surge in COVID-19 cases and deaths in India is paralleled by the spread of the novel  
241 SARS-CoV-2 variant B.1.617. This variant harbors mutations in the RBD and other parts of the S  
242 protein that might alter important biological properties of the virus, including the efficiency of  
243 entry into target cells and the susceptibility to drugs and antibodies targeting the entry process.  
244 The present study reveals that the B.1.617 S protein can facilitate entry into Calu-3 lung and  
245 Caco-2 colon cells with slightly increased efficiency and shows that entry can be blocked by  
246 soluble ACE2 and Camostat. In contrast, Bamlanivimab, a recombinant antibody with EUA did  
247 not inhibit entry driven by the B.1.617 S protein and evidence for moderate evasion of antibodies  
248 induced by infection and Comirnaty/BNT162b2 vaccination was obtained.

249 The spread of variant B.1.617 in India might be partially due to increased fitness of this  
250 variant, i.e. an increased ability to amplify in patients and to be transmitted between patients.  
251 Augmented fitness has been documented for SARS-CoV-2 variant B.1.1.7 (Frampton et al.,  
252 2021; Graham et al., 2021; Leung et al., 2021) but the underlying mechanism is unclear.  
253 Increased host cell entry due to more efficient ACE2 binding or more robust proteolytic  
254 activation of the S protein might contribute to augmented fitness. Host cell entry driven by the  
255 B.1.617 S protein was not increased when cell lines were examined that expressed moderate  
256 levels of endogenous ACE2, like 293T cells, arguing against more efficient ACE2 usage by  
257 variant B.1.617. Similarly, the comparable inhibition of particles bearing WT or B.1.617 S  
258 protein by soluble ACE2 points towards no substantial differences in ACE2 binding efficiency.  
259 However, the B.1.617 S protein facilitated moderately increased entry into the human lung and  
260 intestinal cell lines Calu-3 and Caco-2, respectively, and this effect was much less pronounced  
261 when ACE2 was overexpressed in Calu-3 cells. Therefore, one can speculate that B.1.617 may  
262 have an increased ability to use certain entry augmenting factors that are expressed in a cell type

263 specific fashion. Potential candidates are heparan sulfate (Clausen et al., 2020), Axl (Wang et al.,  
264 2021b) and neuropilin-1 (Cantuti-Castelvetri et al., 2020).

265 Another explanation for the increased spread of variant B.1.617 in India might be immune  
266 evasion, i.e. the ability to spread in a population in which a substantial portion of individuals has  
267 preexisting immune responses against SARS-CoV-2. This is the case in India, at least in certain  
268 areas or resource-poor communities, in which seroprevalence can be higher than 70% (Kar et al.,  
269 2021; Malani et al., 2021; Mohanan et al., 2021). The RBD of the B.1.617 S protein harbors two  
270 mutations associated with (L452R) or suspected (E484Q) of antibody evasion. Thus, mutation  
271 L452R was previously shown to facilitate escape from neutralizing antibodies (Li et al., 2020).  
272 Moreover, E484K present the B.1.351 and P.1 variants confers antibody resistance (Li et al.,  
273 2021) and one could speculate that exchange E484Q might have a similar effect. In fact, both  
274 L452R and E484K are likely responsible for B.1.617 resistance to Bamlanivimab (Starr et al.,  
275 2021) (Figure S2). In the light of these findings it was not unexpected that evasion of the B.1.617  
276 S protein from antibodies in plasma from COVID-19 convalescent patients and  
277 Comirnaty/BNT162b2 vaccinated individuals was observed. However, evasion from antibody-  
278 mediated neutralization by B.1.617 S was clearly less pronounced as compared to the S protein of  
279 the B.1.351 variant. Differences between these variants regarding the additional mutations  
280 located in and outside of the RBD likely account for their differential neutralization sensitivity.

281 Collectively, our results suggest that although B.1.617 may be able to evade control by  
282 antibodies to some extent other factors might contribute to its fast spread, including a potential  
283 fitness benefit or reduced adherence to COVID-19 protection measures (e.g. mask wearing and  
284 social distancing).

285

286

287 **ACKNOWLEDGMENTS**

288 We like to thank Roberto Cattaneo, Georg Herrler, Stephan Ludwig, Andrea Maisner, Thomas  
289 Pietschmann and Gert Zimmer for providing reagents. We gratefully acknowledge the originating  
290 laboratories responsible for obtaining the specimens and the submitting laboratories where  
291 genetic sequence data were generated and shared via the GISAID Initiative, on which this  
292 research is based. J.M. acknowledges funding by a Collaborative Research Centre grant of the  
293 German Research Foundation (316249678 – SFB 1279), the European Union’s Horizon 2020  
294 research and innovation programme under grant agreement No 101003555 (Fight-nCoV) and the  
295 Federal Ministry of Economics, Germany (Combi-CoV-2). S.P. acknowledges funding by BMBF  
296 (RAPID Consortium, 01KI1723D and 01KI2006D; RENACO, 01KI20328A, 01KI20396,  
297 COVIM consortium), the county of Lower Saxony and the German Research Foundation (DFG).  
298 N.K. acknowledges funding by BMBF (ANI-CoV, 01KI2074A). M.S.W. received unrestricted  
299 funding from Sartorius AG, Lung research.

300

301

302 **AUTHOR CONTRIBUTIONS**

303 Conceptualization, M.H., S.P.; Funding acquisition, S.P.; Investigation, M.H., H.H.-W., N.K.,  
304 A.K., I.N., L.G., A.S., A.-S.M.; Essential resources, M.S.W., S.S., H.-M.J., M.V.S., G.M.N.B.;  
305 Writing, M.H., S.P.; Review and editing, all authors.

306

307 **DECLARATION OF INTEREST**

308 The authors declare not competing interests

309

310

311 **MATERIALS AND METHODS**

312

313 **Cell culture**

314 293T (human, female, kidney; ACC-635, DSMZ, RRID: CVCL\_0063), Huh-7 (human, male,  
315 liver; JCRB0403, JCRB; RRID: CVCL\_0336, kindly provided by Thomas Pietschmann,  
316 TWINCORE, Centre for Experimental and Clinical Infection Research, Hannover, Germany),  
317 BHK-21 (Syrian hamster, male, kidney; ATCC Cat# CCL-10; RRID: CVCL\_1915, kindly  
318 provided by Georg Herrler, University of Veterinary Medicine, Hannover, Germany) and Vero76  
319 cells (African green monkey, female, kidney; CRL-1586, ATCC; RRID: CVCL\_0574, kindly  
320 provided by Andrea Maisner, Institute of Virology, Philipps University Marburg, Marburg,  
321 Germany) were cultivated in Dulbecco's modified Eagle medium (DMEM) supplemented with  
322 10% fetal bovine serum (FCS, Biochrom or GIBCO), 100 U/ml of penicillin and 0.1 mg/ml of  
323 streptomycin (PAN-Biotech). Caco-2 (human, male, intestine; HTB-37, ATCC,  
324 RRID:CVCL\_0025), Calu-3 (human, male, lung; HTB-55, ATCC; RRID: CVCL\_0609, kindly  
325 provided by Stephan Ludwig, Institute of Virology, University of Münster, Germany) and Calu-3  
326 cells stably overexpressing ACE2, Calu-3 (ACE2) (Hoffmann et al., 2021c), were cultivated in  
327 minimum essential medium supplemented with 10% FCS, 100 U/ml of penicillin and 0.1 mg/ml  
328 of streptomycin (PAN-Biotech), 1x non-essential amino acid solution (from 100x stock, PAA)  
329 and 1 mM sodium pyruvate (Thermo Fisher Scientific). Calu-3 (ACE2) cells further received 0.5  
330 µg/ml puromycin (Invivogen). A549-ACE2 (Hoffmann et al., 2021a) and A549-  
331 ACE2/TMPRSS2 cells (Hoffmann et al., 2021a) were derived from parental A549 cells (human,  
332 male, lung; CRM-CCL-185, ATCC, RRID:CVCL\_0023; kindly provided by Georg Herrler) and  
333 cultivated in DMEM/F-12 Medium (ThermoFisher Scientific) supplemented with 10% FCS, 100  
334 U/ml of penicillin and 0.1 mg/ml of streptomycin (PAN-Biotech), 1x non-essential amino acid

335 solution (from 100x stock, PAA), 1 mM sodium pyruvate (Thermo Fisher Scientific) and 0.5  
336  $\mu\text{g/ml}$  puromycin (Invivogen). A549-ACE2/TMPRSS2 cells further received 1  $\mu\text{g/ml}$  blasticidin  
337 (Invivogen).

338 All cell lines were incubated at 37 °C in a humidified atmosphere containing 5% CO<sub>2</sub>.  
339 Authentication of cell lines was performed by STR-typing, amplification and sequencing of a  
340 fragment of the cytochrome c oxidase gene, microscopic examination and/or according to their  
341 growth characteristics. In addition, cell lines were routinely tested for contamination by  
342 mycoplasma.

343

#### 344 **Expression plasmids**

345 Expression plasmids for DsRed (Hoffmann et al., 2020), vesicular stomatitis virus (VSV,  
346 serotype Indiana) glycoprotein (VSV-G) (Brinkmann et al., 2017), WT SARS-CoV-2 S (codon-  
347 optimized, based on the Wuhan/Hu-1/2019 isolate, contains D614G exchange; with a C-terminal  
348 truncation of 18 amino acid) (Hoffmann et al., 2021a), SARS-CoV-2 S B.1.351 (codon-  
349 optimized; with a C-terminal truncation of 18 amino acid) (Hoffmann et al., 2021a), angiotensin-  
350 converting enzyme 2 (ACE2) (Hoffmann et al., 2013) and soluble ACE2 (Hoffmann et al.,  
351 2021a) have been described before. In order to generate the expression vector for the S protein of  
352 SARS-CoV-2 variant B.1.617, the required mutations were inserted into the WT SARS-CoV-2 S  
353 sequence by overlap extension PCR. The resulting open reading frame was further inserted into  
354 the pCG1 plasmid (kindly provided by Roberto Cattaneo, Mayo Clinic College of Medicine,  
355 Rochester, MN, USA), making use of the unique BamHI and XbaI restriction sites. Sequence  
356 integrity was verified by sequencing using a commercial sequencing service (Microsynth  
357 SeqLab). Specific cloning details (e.g., primer sequences and restriction sites) are available upon  
358 request. Transfection of 293T cells was carried out by the calcium-phosphate precipitation

359 method, while BHK-21 cells were transfected using Lipofectamine LTX (Thermo Fisher  
360 Scientific).

361

### 362 **Sequence analysis and protein models**

363 The S protein sequence of SARS-CoV-2 S variant B.1.617 (GISAID Accession ID:  
364 PI\_ISL\_1360382) was obtained from the GISAID (global initiative on sharing all influenza data)  
365 database (<https://www.gisaid.org/>). Protein models were generated using the YASARA software  
366 (<http://www.yasara.org/index.html>) and are based on PDB: 6XDG (Hansen et al., 2020), PDB:  
367 7L3N (Jones et al., 2020) or PDB: 7C01 (Shi et al., 2020), or a template that was constructed by  
368 modelling the SARS-2-S sequence on PDB: 6XR8 (Cai et al., 2020), using the SWISS-MODEL  
369 online tool (<https://swissmodel.expasy.org/>).

370

### 371 **Preparation of vesicular stomatitis virus pseudotypes**

372 For this study, we employed rhabdoviral pseudotype particles that are based on a replication-  
373 deficient VSV vector that lacks the genetic information for VSV-G and instead codes for two  
374 reporter proteins, enhanced green fluorescent protein and firefly luciferase (FLuc), VSV\* $\Delta$ G-  
375 FLuc (kindly provided by Gert Zimmer, Institute of Virology and Immunology, Mithelhäusern,  
376 Switzerland) (Berger Rentsch and Zimmer, 2011). Pseudotyping of VSV\* $\Delta$ G-FLuc was carried  
377 out according to a published protocol (Kleine-Weber et al., 2019). First, 293T cells that expressed  
378 the respective S protein, VSV-G (or no viral protein, control) following transfection were  
379 inoculated with VSV\* $\Delta$ G-FLuc at a multiplicity of infection of three and incubated for 1 h at 37  
380 °C. Next, the inoculum was aspirated and cells were washed with phosphate-buffered saline  
381 (PBS). Thereafter, cells received culture medium containing anti-VSV-G antibody (culture  
382 supernatant from I1-hybridoma cells; ATCC no. CRL-2700; except for cells expressing VSV-G,



383 which received only medium) and incubated for 16-18 h. Then, pseudotype particles were  
384 harvested. For this, the culture supernatant was collected and centrifuged (2,000 x g, 10 min,  
385 room temperature) in order to pellet cellular debris. Finally, the clarified supernatant was  
386 aliquoted and stored at -80 °C.

387

### 388 **Production of soluble ACE2**

389 For the production of soluble ACE2 fused to the Fc portion of human immunoglobulin G (IgG),  
390 sol-ACE2, 293T cells were grown in a T-75 flask and transfected with 20 µg of sol-ACE2  
391 expression plasmid. The medium was exchanged at 10 h posttransfection and cells were further  
392 incubated for 38 h. Then, the culture supernatant was collected and the cells received fresh  
393 medium and were further incubated. The collected supernatant was further centrifuged (2,000 x  
394 g, 10 min, 4 °C) and stored at 4 °C. After an additional 24 h, the culture supernatant was  
395 harvested and centrifuged as described before. Next, the clarified supernatants from both harvests  
396 were combined, loaded onto Vivaspin protein concentrator columns with a molecular weight cut-  
397 off of 30 kDa (Sartorius) and centrifuged at 4,000 x g at 4 °C until a concentration factor of 20  
398 was achieved. Finally, the concentrated sol-ACE2 was aliquoted and stored at -80 °C.

399

### 400 **Collection of serum and plasma samples**

401 All plasma samples were heat-inactivated (56 °C, 30 min) before analysis. Further, all plasma  
402 were pre-screened for the presence of neutralizing activity against WT SARS-CoV-2 S using a  
403 pseudotype neutralization test. Convalescent plasma samples were collected from COVID-19  
404 patients treated at the intensive care unit of the University Medicine Göttingen under approval  
405 given by the ethic committee of the University Medicine Göttingen (SeptImmun Study 25/4/19  
406 Ü). For collection of convalescent plasma, Cell Preparation Tube (CPT) vacutainers with sodium

407 citrate were used and plasma was collected as supernatant over the PBMC layer. Plasma from  
408 individuals vaccinated with BioNTech/Pfizer vaccine BNT162b2/ Comirnaty were obtained 24-  
409 31 days after the second dose. The study was approved by the Institutional Review Board of  
410 Hannover Medical School (8973\_BO\_K\_2020). For vaccinated patients, blood was collected in  
411 S-Monovette® EDTA tubes (Sarstedt).

412

### 413 **Transduction of target cells**

414 All transduction experiments were carried out in 96-well format at a cell confluency of 50-80%.  
415 For experiments addressing cell tropism and entry efficiency, Vero, Caco-2, Calu-3, Calu-3  
416 (ACE2), 293T, A549 (ACE2), A549 (ACE2+TMPRSS2) and Huh-7 target cells were inoculated  
417 with identical volumes of pseudotype preparations. BHK-21 cells were transfected 24 h prior to  
418 pseudotype inoculation with either empty plasmid or ACE2 expression plasmid (0.1 µg/well)  
419 using Lipofectamine LTX (Thermo Fisher Scientific). In order to study the antiviral activity of  
420 Camostat mesylate, Caco-2 target cells, which express endogenous TMPRSS2, were pre-  
421 incubated for 1 h with medium containing different concentrations (100, 10, 1, 0.1 or 0.01 µM) of  
422 Camostat mesylate (prepared from a 100 mM stock; Tocris) or the solvent dimethyl sulfoxide  
423 (DMSO, 1:1,000; Sigma-Aldrich) as control before being inoculated with VSV bearing S protein,  
424 VSV-G or no glycoprotein. For experiments addressing the antiviral activity of soluble ACE2,  
425 pseudotype particles bearing S protein, VSV-G or no protein were pre-incubated with different  
426 amounts of concentrated sol-ACE2 (final sol-ACE2 dilutions in the mixtures: undiluted, 1:10,  
427 1:100, 1:1,000:10,000) or only medium for 30 min at 37 °C, before the mixtures were added onto  
428 Caco-2 cells. In all cases, transduction efficiency was determined at 16-18 h postinoculation. For  
429 this, the culture supernatant was aspirated. Next, cells were lysed in PBS containing 0.5% Triton-  
430 X-100 (Carl Roth) for 30 min at room temperature. Thereafter, cell lysates were transferred into

431 white 96-well plates. Finally, FLuc activity was measured using a commercial substrate (Beetle-  
432 Juice, PJK; Luciferase Assay System, Promega) and Hidex Sense Plate Reader (Hidex).

433

#### 434 **Pseudotype particle neutralization test**

435 For neutralization experiments, S protein bearing pseudotype particles were pre-incubated for 30  
436 min at 37 °C with different concentrations of monoclonal antibodies (Casirivimab, Imdevimab,  
437 Casirivimab+Imdevimab [1:1], Bamlanivimab, Esetevimab, Bamlanivimab+Etesevimab [1:1] or  
438 unrelated control IgG [2, 0.2, 0.02, 0.002, 0.0002, 0.00002 µg/ml]) or plasma samples obtained  
439 from convalescent COVID-19 patients or individuals vaccinated with the Pfizer/BioNTech  
440 vaccine BNT162b2/Comirnaty (1:25, 1:100, 1:400, 1:1,600, 1:6,400, 1:25,600), before the  
441 mixtures were inoculated onto Vero cells. In all cases, particles incubated only with medium  
442 served as control. Transduction efficiency was determined at 16-18 h postinoculation as  
443 described above.

444

#### 445 **Data analysis**

446 The results presented in this study represent average (mean) data obtained from three biological  
447 replicates, each conducted with technical quadruplicates. The only exception are the  
448 neutralization data involving plasma from infected/vaccinated individuals, which are based on a  
449 single experiment (standard in the field), conducted with technical quadruplicates. Error bars are  
450 defined as either standard deviation (SD, neutralization data involving plasma from  
451 infected/vaccinated individuals) or standard error of the mean (SEM, all other data). Data were  
452 analyzed using Microsoft Excel (as part of the Microsoft Office software package, version 2019,  
453 Microsoft Corporation) and GraphPad Prism 8 version 8.4.3 (GraphPad Software).

454 Data normalization was performed in the following fashion: (i) For comparison of entry  
455 efficiency by the different S proteins, transduction was normalized against WT SARS-CoV-2 S  
456 (set as 100%). Alternatively, transduction was normalized against the background signal  
457 (luminescence measured for cells inoculated with particles bearing no viral glycoprotein; set as  
458 1). (ii) In order to investigate inhibition of S protein-driven cell entry by sol-ACE2, Camostat  
459 mesylate, monoclonal antibodies or plasma from infected/vaccinated individuals, transduction  
460 was normalized against a reference sample (e.g., control-treated cells or pseudotypes, set as 0%  
461 inhibition).

462 The neutralizing titer 50 (NT50) value, which indicates the plasma dilution that causes a  
463 50 % reduction of transduction efficiency, was calculated using a non-linear regression model  
464 (inhibitor vs. normalized response, variable slope). Statistical significance was tested by one- or  
465 two-way analysis of variance (ANOVA) with Dunnett's post-hoc test, paired Students t-test or by  
466 multiple t-test with correction for multiple comparison (Holm-Sidak method). Only p values of  
467 0.05 or lower were considered statistically significant ( $p > 0.05$ , not significant [ns];  $p \leq 0.05$ , \*;  
468  $p \leq 0.01$ , \*\*;  $p \leq 0.001$ , \*\*\*). The details on the statistical test and the error bars are specified in  
469 the figure legends.

470

471

472

473

474

475

476

477

478 **REFERENCES**

- 479
- 480 Ali, F., Kasry, A., and Amin, M. (2021). The new SARS-CoV-2 strain shows a stronger binding  
481 affinity to ACE2 due to N501Y mutant. *Med Drug Discov 10*, 100086.
- 482 Baden, L.R., El Sahly, H.M., Essink, B., Kotloff, K., Frey, S., Novak, R., Diemert, D., Spector,  
483 S.A., Roupheal, N., Creech, C.B., *et al.* (2021). Efficacy and Safety of the mRNA-1273 SARS-  
484 CoV-2 Vaccine. *N Engl J Med 384*, 403-416.
- 485 Berger Rentsch, M., and Zimmer, G. (2011). A vesicular stomatitis virus replicon-based bioassay  
486 for the rapid and sensitive determination of multi-species type I interferon. *PLoS One 6*, e25858.
- 487 Brinkmann, C., Hoffmann, M., Lubke, A., Nehlmeier, I., Kramer-Kuhl, A., Winkler, M., and  
488 Pohlmann, S. (2017). The glycoprotein of vesicular stomatitis virus promotes release of virus-like  
489 particles from tetherin-positive cells. *PLoS One 12*, e0189073.
- 490 Cai, Y., Zhang, J., Xiao, T., Peng, H., Sterling, S.M., Walsh, R.M., Jr., Rawson, S., Rits-Volloch,  
491 S., and Chen, B. (2020). Distinct conformational states of SARS-CoV-2 spike protein. *Science*  
492 *369*, 1586-1592.
- 493 Cantuti-Castelvetri, L., Ojha, R., Pedro, L.D., Djannatian, M., Franz, J., Kuivanen, S., van der  
494 Meer, F., Kallio, K., Kaya, T., Anastasina, M., *et al.* (2020). Neuropilin-1 facilitates SARS-CoV-  
495 2 cell entry and infectivity. *Science 370*, 856-860.
- 496 Chen, P., Nirula, A., Heller, B., Gottlieb, R.L., Boscia, J., Morris, J., Huhn, G., Cardona, J.,  
497 Mocherla, B., Stosor, V., *et al.* (2021a). SARS-CoV-2 Neutralizing Antibody LY-CoV555 in  
498 Outpatients with Covid-19. *N Engl J Med 384*, 229-237.
- 499 Chen, R.E., Zhang, X., Case, J.B., Winkler, E.S., Liu, Y., VanBlargan, L.A., Liu, J., Errico, J.M.,  
500 Xie, X., Suryadevara, N., *et al.* (2021b). Resistance of SARS-CoV-2 variants to neutralization by  
501 monoclonal and serum-derived polyclonal antibodies. *Nat Med*.
- 502 Clausen, T.M., Sandoval, D.R., Spliid, C.B., Pihl, J., Perrett, H.R., Painter, C.D., Narayanan, A.,  
503 Majowicz, S.A., Kwong, E.M., McVicar, R.N., *et al.* (2020). SARS-CoV-2 Infection Depends on  
504 Cellular Heparan Sulfate and ACE2. *Cell 183*, 1043-1057 e1015.

- 505 Collier, D.A., De Marco, A., Ferreira, I., Meng, B., Datir, R.P., Walls, A.C., Kemp, S.A., Bassi,  
506 J., Pinto, D., Silacci-Fregni, C., *et al.* (2021). Sensitivity of SARS-CoV-2 B.1.1.7 to mRNA  
507 vaccine-elicited antibodies. *Nature*.
- 508 Dejnirattisai, W., Zhou, D., Supasa, P., Liu, C., Mentzer, A.J., Ginn, H.M., Zhao, Y.,  
509 Duyvesteyn, H.M.E., Tuekprakhon, A., Nutalai, R., *et al.* (2021). Antibody evasion by the P.1  
510 strain of SARS-CoV-2. *Cell*.
- 511 Edara, V.V., Norwood, C., Floyd, K., Lai, L., Davis-Gardner, M.E., Hudson, W.H., Mantus, G.,  
512 Nyhoff, L.E., Adelman, M.W., Fineman, R., *et al.* (2021). Infection- and vaccine-induced  
513 antibody binding and neutralization of the B.1.351 SARS-CoV-2 variant. *Cell Host Microbe* 29,  
514 516-521 e513.
- 515 Faria, N.R., Mellan, T.A., Whittaker, C., Claro, I.M., Candido, D.D.S., Mishra, S., Crispim,  
516 M.A.E., Sales, F.C.S., Hawryluk, I., McCrone, J.T., *et al.* (2021). Genomics and epidemiology of  
517 the P.1 SARS-CoV-2 lineage in Manaus, Brazil. *Science*.
- 518 Frampton, D., Rampling, T., Cross, A., Bailey, H., Heaney, J., Byott, M., Scott, R., Sconza, R.,  
519 Price, J., Margaritis, M., *et al.* (2021). Genomic characteristics and clinical effect of the emergent  
520 SARS-CoV-2 B.1.1.7 lineage in London, UK: a whole-genome sequencing and hospital-based  
521 cohort study. *Lancet Infect Dis*.
- 522 Garcia-Beltran, W.F., Lam, E.C., St Denis, K., Nitido, A.D., Garcia, Z.H., Hauser, B.M.,  
523 Feldman, J., Pavlovic, M.N., Gregory, D.J., Poznansky, M.C., *et al.* (2021). Multiple SARS-  
524 CoV-2 variants escape neutralization by vaccine-induced humoral immunity. *Cell* 184, 2372-  
525 2383 e2379.
- 526 Gottlieb, R.L., Nirula, A., Chen, P., Boscia, J., Heller, B., Morris, J., Huhn, G., Cardona, J.,  
527 Mocherla, B., Stosor, V., *et al.* (2021). Effect of Bamlanivimab as Monotherapy or in  
528 Combination With Etesevimab on Viral Load in Patients With Mild to Moderate COVID-19: A  
529 Randomized Clinical Trial. *JAMA* 325, 632-644.
- 530 Graham, M.S., Sudre, C.H., May, A., Antonelli, M., Murray, B., Varsavsky, T., Klaser, K.,  
531 Canas, L.S., Molteni, E., Modat, M., *et al.* (2021). Changes in symptomatology, reinfection, and

532 transmissibility associated with the SARS-CoV-2 variant B.1.1.7: an ecological study. *Lancet*  
533 *Public Health*.

534 Grifoni, A., Weiskopf, D., Ramirez, S.I., Mateus, J., Dan, J.M., Moderbacher, C.R., Rawlings,  
535 S.A., Sutherland, A., Premkumar, L., Jadi, R.S., *et al.* (2020). Targets of T Cell Responses to  
536 SARS-CoV-2 Coronavirus in Humans with COVID-19 Disease and Unexposed Individuals. *Cell*  
537 *181*, 1489-1501 e1415.

538 Hansen, J., Baum, A., Pascal, K.E., Russo, V., Giordano, S., Wloga, E., Fulton, B.O., Yan, Y.,  
539 Koon, K., Patel, K., *et al.* (2020). Studies in humanized mice and convalescent humans yield a  
540 SARS-CoV-2 antibody cocktail. *Science* *369*, 1010-1014.

541 Hoffmann, M., Arora, P., Gross, R., Seidel, A., Hornich, B.F., Hahn, A.S., Kruger, N., Graichen,  
542 L., Hofmann-Winkler, H., Kempf, A., *et al.* (2021a). SARS-CoV-2 variants B.1.351 and P.1  
543 escape from neutralizing antibodies. *Cell*.

544 Hoffmann, M., Hofmann-Winkler, H., Smith, J.C., Kruger, N., Arora, P., Sorensen, L.K.,  
545 Sogaard, O.S., Hasselstrom, J.B., Winkler, M., Hempel, T., *et al.* (2021b). Camostat mesylate  
546 inhibits SARS-CoV-2 activation by TMPRSS2-related proteases and its metabolite GBPA exerts  
547 antiviral activity. *EBioMedicine* *65*, 103255.

548 Hoffmann, M., Kleine-Weber, H., Schroeder, S., Kruger, N., Herrler, T., Erichsen, S.,  
549 Schiergens, T.S., Herrler, G., Wu, N.H., Nitsche, A., *et al.* (2020). SARS-CoV-2 Cell Entry  
550 Depends on ACE2 and TMPRSS2 and Is Blocked by a Clinically Proven Protease Inhibitor. *Cell*  
551 *181*, 271-280 e278.

552 Hoffmann, M., Muller, M.A., Drexler, J.F., Glende, J., Erdt, M., Gutzkow, T., Losemann, C.,  
553 Binger, T., Deng, H., Schwegmann-Wessels, C., *et al.* (2013). Differential sensitivity of bat cells  
554 to infection by enveloped RNA viruses: coronaviruses, paramyxoviruses, filoviruses, and  
555 influenza viruses. *PLoS One* *8*, e72942.

556 Hoffmann, M., Zhang, L., Kruger, N., Graichen, L., Kleine-Weber, H., Hofmann-Winkler, H.,  
557 Kempf, A., Nessler, S., Riggert, J., Winkler, M.S., *et al.* (2021c). SARS-CoV-2 mutations  
558 acquired in mink reduce antibody-mediated neutralization. *Cell Rep* *35*, 109017.

- 559 Jones, B.E., Brown-Augsburger, P.L., Corbett, K.S., Westendorf, K., Davies, J., Cujec, T.P.,  
560 Wiethoff, C.M., Blackbourne, J.L., Heinz, B.A., Foster, D., *et al.* (2020). LY-CoV555, a rapidly  
561 isolated potent neutralizing antibody, provides protection in a non-human primate model of  
562 SARS-CoV-2 infection. *bioRxiv*.
- 563 Kar, S.S., Sarkar, S., Murali, S., Dhodapkar, R., Joseph, N.M., and Aggarwal, R. (2021).  
564 Prevalence and Time Trend of SARS-CoV-2 Infection in Puducherry, India, August-October  
565 2020. *Emerg Infect Dis* 27, 666-669.
- 566 Kleine-Weber, H., Elzayat, M.T., Wang, L., Graham, B.S., Muller, M.A., Drosten, C., Pohlmann,  
567 S., and Hoffmann, M. (2019). Mutations in the Spike Protein of Middle East Respiratory  
568 Syndrome Coronavirus Transmitted in Korea Increase Resistance to Antibody-Mediated  
569 Neutralization. *J Virol* 93.
- 570 Kuba, K., Imai, Y., Rao, S., Gao, H., Guo, F., Guan, B., Huan, Y., Yang, P., Zhang, Y., Deng,  
571 W., *et al.* (2005). A crucial role of angiotensin converting enzyme 2 (ACE2) in SARS  
572 coronavirus-induced lung injury. *Nat Med* 11, 875-879.
- 573 Kuzmina, A., Khalaila, Y., Voloshin, O., Keren-Naus, A., Boehm-Cohen, L., Raviv, Y., Shemer-  
574 Avni, Y., Rosenberg, E., and Taube, R. (2021). SARS-CoV-2 spike variants exhibit differential  
575 infectivity and neutralization resistance to convalescent or post-vaccination sera. *Cell Host*  
576 *Microbe* 29, 522-528 e522.
- 577 Leung, K., Shum, M.H., Leung, G.M., Lam, T.T., and Wu, J.T. (2021). Early transmissibility  
578 assessment of the N501Y mutant strains of SARS-CoV-2 in the United Kingdom, October to  
579 November 2020. *Euro Surveill* 26.
- 580 Li, Q., Nie, J., Wu, J., Zhang, L., Ding, R., Wang, H., Zhang, Y., Li, T., Liu, S., Zhang, M., *et al.*  
581 (2021). SARS-CoV-2 501Y.V2 variants lack higher infectivity but do have immune escape. *Cell*  
582 *184*, 2362-2371 e2369.
- 583 Li, Q., Wu, J., Nie, J., Zhang, L., Hao, H., Liu, S., Zhao, C., Zhang, Q., Liu, H., Nie, L., *et al.*  
584 (2020). The Impact of Mutations in SARS-CoV-2 Spike on Viral Infectivity and Antigenicity.  
585 *Cell* 182, 1284-1294 e1289.



- 586 Liu, Z., VanBlargan, L.A., Bloyet, L.M., Rothlauf, P.W., Chen, R.E., Stumpf, S., Zhao, H.,  
587 Errico, J.M., Theel, E.S., Liebeskind, M.J., *et al.* (2021). Identification of SARS-CoV-2 spike  
588 mutations that attenuate monoclonal and serum antibody neutralization. *Cell Host Microbe* 29,  
589 477-488 e474.
- 590 Luan, B., Wang, H., and Huynh, T. (2021). Enhanced binding of the N501Y-mutated SARS-  
591 CoV-2 spike protein to the human ACE2 receptor: insights from molecular dynamics simulations.  
592 *FEBS Lett.*
- 593 Malani, A., Shah, D., Kang, G., Lobo, G.N., Shastri, J., Mohanan, M., Jain, R., Agrawal, S.,  
594 Juneja, S., Imad, S., *et al.* (2021). Seroprevalence of SARS-CoV-2 in slums versus non-slums in  
595 Mumbai, India. *Lancet Glob Health* 9, e110-e111.
- 596 Mohanan, M., Malani, A., Krishnan, K., and Acharya, A. (2021). Prevalence of SARS-CoV-2 in  
597 Karnataka, India. *JAMA* 325, 1001-1003.
- 598 Monteil, V., Kwon, H., Prado, P., Hagelkruys, A., Wimmer, R.A., Stahl, M., Leopoldi, A.,  
599 Garreta, E., Hurtado Del Pozo, C., Prosper, F., *et al.* (2020). Inhibition of SARS-CoV-2  
600 Infections in Engineered Human Tissues Using Clinical-Grade Soluble Human ACE2. *Cell* 181,  
601 905-913 e907.
- 602 Muik, A., Wallisch, A.K., Sanger, B., Swanson, K.A., Muhl, J., Chen, W., Cai, H., Maurus, D.,  
603 Sarkar, R., Tureci, O., *et al.* (2021). Neutralization of SARS-CoV-2 lineage B.1.1.7 pseudovirus  
604 by BNT162b2 vaccine-elicited human sera. *Science* 371, 1152-1153.
- 605 Peng, Y., Mentzer, A.J., Liu, G., Yao, X., Yin, Z., Dong, D., Dejnirattisai, W., Rostron, T.,  
606 Supasa, P., Liu, C., *et al.* (2020). Broad and strong memory CD4(+) and CD8(+) T cells induced  
607 by SARS-CoV-2 in UK convalescent individuals following COVID-19. *Nat Immunol* 21, 1336-  
608 1345.
- 609 Planas, D., Bruel, T., Grzelak, L., Guivel-Benhassine, F., Staropoli, I., Porrot, F., Planchais, C.,  
610 Buchrieser, J., Rajah, M.M., Bishop, E., *et al.* (2021). Sensitivity of infectious SARS-CoV-2  
611 B.1.1.7 and B.1.351 variants to neutralizing antibodies. *Nat Med.*

- 612 Plante, J.A., Mitchell, B.M., Plante, K.S., Debbink, K., Weaver, S.C., and Menachery, V.D.  
613 (2021). The variant gambit: COVID-19's next move. *Cell Host Microbe* 29, 508-515.
- 614 Polack, F.P., Thomas, S.J., Kitchin, N., Absalon, J., Gurtman, A., Lockhart, S., Perez, J.L., Perez  
615 Marc, G., Moreira, E.D., Zerbini, C., *et al.* (2020). Safety and Efficacy of the BNT162b2 mRNA  
616 Covid-19 Vaccine. *N Engl J Med* 383, 2603-2615.
- 617 Riepler, L., Rossler, A., Falch, A., Volland, A., Borena, W., von Laer, D., and Kimpel, J. (2020).  
618 Comparison of Four SARS-CoV-2 Neutralization Assays. *Vaccines (Basel)* 9.
- 619 Rodda, L.B., Netland, J., Shehata, L., Pruner, K.B., Morawski, P.A., Thouvenel, C.D., Takehara,  
620 K.K., Eggenberger, J., Hemann, E.A., Waterman, H.R., *et al.* (2021). Functional SARS-CoV-2-  
621 Specific Immune Memory Persists after Mild COVID-19. *Cell* 184, 169-183 e117.
- 622 Schmidt, F., Weisblum, Y., Muecksch, F., Hoffmann, H.H., Michailidis, E., Lorenzi, J.C.C.,  
623 Mendoza, P., Rutkowska, M., Bednarski, E., Gaebler, C., *et al.* (2020). Measuring SARS-CoV-2  
624 neutralizing antibody activity using pseudotyped and chimeric viruses. *J Exp Med* 217.
- 625 Shen, X., Tang, H., McDanal, C., Wagh, K., Fischer, W., Theiler, J., Yoon, H., Li, D., Haynes,  
626 B.F., Sanders, K.O., *et al.* (2021). SARS-CoV-2 variant B.1.1.7 is susceptible to neutralizing  
627 antibodies elicited by ancestral spike vaccines. *Cell Host Microbe*.
- 628 Shi, R., Shan, C., Duan, X., Chen, Z., Liu, P., Song, J., Song, T., Bi, X., Han, C., Wu, L., *et al.*  
629 (2020). A human neutralizing antibody targets the receptor-binding site of SARS-CoV-2. *Nature*  
630 584, 120-124.
- 631 Starr, T.N., Greaney, A.J., Dingens, A.S., and Bloom, J.D. (2021). Complete map of SARS-CoV-  
632 2 RBD mutations that escape the monoclonal antibody LY-CoV555 and its cocktail with LY-  
633 CoV016. *Cell Rep Med* 2, 100255.
- 634 Supasa, P., Zhou, D., Dejnirattisai, W., Liu, C., Mentzer, A.J., Ginn, H.M., Zhao, Y.,  
635 Duyvesteyn, H.M.E., Nutalai, R., Tuekprakhon, A., *et al.* (2021). Reduced neutralization of  
636 SARS-CoV-2 B.1.1.7 variant by convalescent and vaccine sera. *Cell* 184, 2201-2211 e2207.

- 637 Tegally, H., Wilkinson, E., Giovanetti, M., Iranzadeh, A., Fonseca, V., Giandhari, J., Doolabh,  
638 D., Pillay, S., San, E.J., Msomi, N., *et al.* (2021). Detection of a SARS-CoV-2 variant of concern  
639 in South Africa. *Nature* 592, 438-443.
- 640 Tomazini, B.M., Maia, I.S., Cavalcanti, A.B., Berwanger, O., Rosa, R.G., Veiga, V.C., Avezum,  
641 A., Lopes, R.D., Bueno, F.R., Silva, M., *et al.* (2020). Effect of Dexamethasone on Days Alive  
642 and Ventilator-Free in Patients With Moderate or Severe Acute Respiratory Distress Syndrome  
643 and COVID-19: The CoDEX Randomized Clinical Trial. *JAMA* 324, 1307-1316.
- 644 W.H.O. (2021). Weekly epidemiological update on COVID-19 - 27 April 2021.
- 645 W.H.O. REACT Working Group, W.H.O.R.E.A.f.C.-T.W.G., Sterne, J.A.C., Murthy, S., Diaz,  
646 J.V., Slutsky, A.S., Villar, J., Angus, D.C., Annane, D., Azevedo, L.C.P., Berwanger, O., *et al.*  
647 (2020). Association Between Administration of Systemic Corticosteroids and Mortality Among  
648 Critically Ill Patients With COVID-19: A Meta-analysis. *JAMA* 324, 1330-1341.
- 649 Wajnberg, A., Amanat, F., Firpo, A., Altman, D.R., Bailey, M.J., Mansour, M., McMahon, M.,  
650 Meade, P., Mendu, D.R., Muellers, K., *et al.* (2020). Robust neutralizing antibodies to SARS-  
651 CoV-2 infection persist for months. *Science* 370, 1227-1230.
- 652 Wang, P., Nair, M.S., Liu, L., Iketani, S., Luo, Y., Guo, Y., Wang, M., Yu, J., Zhang, B., Kwong,  
653 P.D., *et al.* (2021a). Antibody resistance of SARS-CoV-2 variants B.1.351 and B.1.1.7. *Nature*.
- 654 Wang, S., Qiu, Z., Hou, Y., Deng, X., Xu, W., Zheng, T., Wu, P., Xie, S., Bian, W., Zhang, C., *et*  
655 *al.* (2021b). AXL is a candidate receptor for SARS-CoV-2 that promotes infection of pulmonary  
656 and bronchial epithelial cells. *Cell Res* 31, 126-140.
- 657 Wang, Z., Schmidt, F., Weisblum, Y., Muecksch, F., Barnes, C.O., Finkin, S., Schaefer-Babajew,  
658 D., Cipolla, M., Gaebler, C., Lieberman, J.A., *et al.* (2021c). mRNA vaccine-elicited antibodies  
659 to SARS-CoV-2 and circulating variants. *Nature* 592, 616-622.
- 660 Xie, X., Liu, Y., Liu, J., Zhang, X., Zou, J., Fontes-Garfias, C.R., Xia, H., Swanson, K.A., Cutler,  
661 M., Cooper, D., *et al.* (2021). Neutralization of SARS-CoV-2 spike 69/70 deletion, E484K and  
662 N501Y variants by BNT162b2 vaccine-elicited sera. *Nat Med* 27, 620-621.

663 Zhou, D., Dejnirattisai, W., Supasa, P., Liu, C., Mentzer, A.J., Ginn, H.M., Zhao, Y.,  
664 Duyvesteyn, H.M.E., Tuekprakhon, A., Nutalai, R., *et al.* (2021). Evidence of escape of SARS-  
665 CoV-2 variant B.1.351 from natural and vaccine-induced sera. *Cell*.

666 Zhou, P., Yang, X.L., Wang, X.G., Hu, B., Zhang, L., Zhang, W., Si, H.R., Zhu, Y., Li, B.,  
667 Huang, C.L., *et al.* (2020). A pneumonia outbreak associated with a new coronavirus of probable  
668 bat origin. *Nature* 579, 270-273.

669

670

671

672

673

674

675

676

677

678

679

680

681

682

683

684

685

686

687

688 **FIGURE LEGENDS**

689

690 **Figure 1. Schematic overview of the S protein from SARS-CoV-2 variant B.1.617**

691 The location of the mutations in the context of the B.1.617 S protein domain organization is  
692 shown in the upper panel. RBD, receptor-binding domain; TD, transmembrane domain. The  
693 location of the mutations in the context of the trimeric S protein is shown in the lower panels.  
694 Color code: light blue, S1 subunit with RBD in dark blue; gray, S2 subunit; orange, S1/S2 and  
695 S2' cleavage sites; red, mutated amino acid residues.

696

697 **Figure 2. The S protein of SARS-CoV-2 variant B.1.617 S drives efficient entry into human**  
698 **cell lines**

699 (A) The S protein of the SARS-CoV-2 variant B.1.617 mediates robust entry into cell lines. The  
700 indicated cell lines were inoculated with pseudotyped particles bearing the S proteins of the  
701 indicated SARS-CoV-2 variants or wild-type (WT) SARS-CoV-2 S. Transduction efficiency was  
702 quantified by measuring virus-encoded luciferase activity in cell lysates at 16-18 h post  
703 transduction. Presented are the average (mean) data from three biological replicates (each  
704 conducted with technical quadruplicates) for which transduction was normalized against SARS-  
705 CoV-2 S WT (= 100%). Error bars indicate the standard error of the mean (SEM). Statistical  
706 significance of differences between WT and variant S proteins was analyzed by one-way analysis  
707 of variance (ANOVA) with Dunnett's posttest ( $p > 0.05$ , not significant [ns];  $p \leq 0.05$ , \*;  $p \leq$   
708  $0.01$ , \*\*;  $p \leq 0.001$ , \*\*\*). See also Figure S1.

709 (B) BHK-21 cells transfected with empty plasmid or ACE2 plasmid were inoculated with  
710 pseudotyped particles bearing the indicated S proteins, VSV-G or no viral glycoprotein (control,  
711 not shown). Presented are the average (mean) data from three biological replicates (each

712 conducted with technical quadruplicates) for which transduction was normalized against the  
713 background (signal obtained for particles without viral glycoprotein, = 1, indicated by the dashed  
714 line). Error bars indicate the SEM. Statistical significance of differences between empty vector  
715 and ACE2-transfected cells was analyzed by multiple t-test with correction multiple comparison  
716 (Holm-Sidak method;  $p > 0.05$ , ns;  $p \leq 0.001$ , \*\*\*).

717  
718 **Figure 3. Entry driven by the S protein of SARS-CoV-2 variant B.1.617 can be blocked with**  
719 **soluble ACE2 and Camostat mesylate**

720 (A) S protein-bearing particles were incubated with different concentrations of soluble ACE2  
721 (sol-ACE2) for 30 min at 37 °C, before the mixtures were inoculated onto Caco-2 cells.

722 (B) Caco-2 target cells were pre-incubated with different concentrations of the serine protease  
723 inhibitor Camostat mesylate for 1 h at 37 °C, before S protein-bearing particles were added.

724 All panels: Transduction efficiency was quantified by measuring virus-encoded luciferase  
725 activity in cell lysates at 16-18 h post-transduction. For normalization, SARS-CoV-2 S protein-  
726 driven entry in the absence of sol-ACE2 or Camostat was set as 0% inhibition. Presented are the  
727 average (mean) data from three biological replicates (each performed with technical  
728 quadruplicates. Error bars indicate the SEM. Statistical significance of differences between WT  
729 and variant S proteins or VSV-G was analyzed by two-way ANOVA with Dunnett's posttest ( $p >$   
730  $0.05$ , ns [not indicated];  $p \leq 0.001$ , \*\*\*).

731  
732 **Figure 4. The S protein of SARS-CoV-2 variant B.1.617 is resistant to neutralization by**  
733 **Bamlanivimab**

734 S protein-bearing particles were incubated with different concentrations of monoclonal antibodies  
735 for 30 min at 37 °C before the mixtures were inoculated onto Vero cells. Transduction efficiency

736 was quantified by measuring virus-encoded luciferase activity in cell lysates at 16-18 h post-  
737 transduction. For normalization, SARS-CoV-2 S protein-driven entry in the absence of  
738 monoclonal antibody was set as 0% inhibition. Presented are the average (mean) data from three  
739 biological replicates (each performed with technical quadruplicates). Error bars indicate the SEM.  
740 Statistical significance of differences between WT and variant S proteins was analyzed by two-  
741 way ANOVA with Dunnett's posttest ( $p > 0.05$ , ns [not indicated];  $p \leq 0.05$ , \*;  $p \leq 0.01$ , \*\*;  $p \leq$   
742  $0.001$ , \*\*\*). See also Figure S2.

743  
744 **Figure 5. The S protein of SARS-CoV-2 variant B.1.617 evades neutralization by antibodies**  
745 **induced upon infection or vaccination with BNT162b2**

746 The S protein of SARS-CoV-2 variant B.1.617 evades neutralization by convalescent plasma (A)  
747 or plasma from BNT162b2-vaccinated individuals (B).

748 Both panels: S protein-bearing particles were incubated with different plasma dilutions (derived  
749 from infected or vaccinated individuals) for 30 min at 37 °C before the mixtures were inoculated  
750 onto Vero cells. Transduction efficiency was quantified by measuring virus-encoded luciferase  
751 activity in cell lysates at 16-18 h post-transduction and used to calculate the plasma/serum  
752 dilution factor that leads to 50 % reduction in S protein-driven cell entry (neutralizing titer 50,  
753 NT50). Presented are the average (mean) data from a single biological replicate (performed with  
754 technical quadruplicates). Error bars indicate the standard deviation. Identical plasma samples are  
755 connected with lines and the numbers in brackets indicate the average (mean) reduction in  
756 neutralization sensitivity for the S proteins of the respective SARS-CoV-2 variants. Statistical  
757 significance of differences between WT and variant S proteins was analyzed by paired two-tailed  
758 Students t-test ( $p > 0.05$ , ns;  $p \leq 0.01$ , \*\*;  $p \leq 0.001$ , \*\*\*). See also Figure S3.

759

## Figure 1

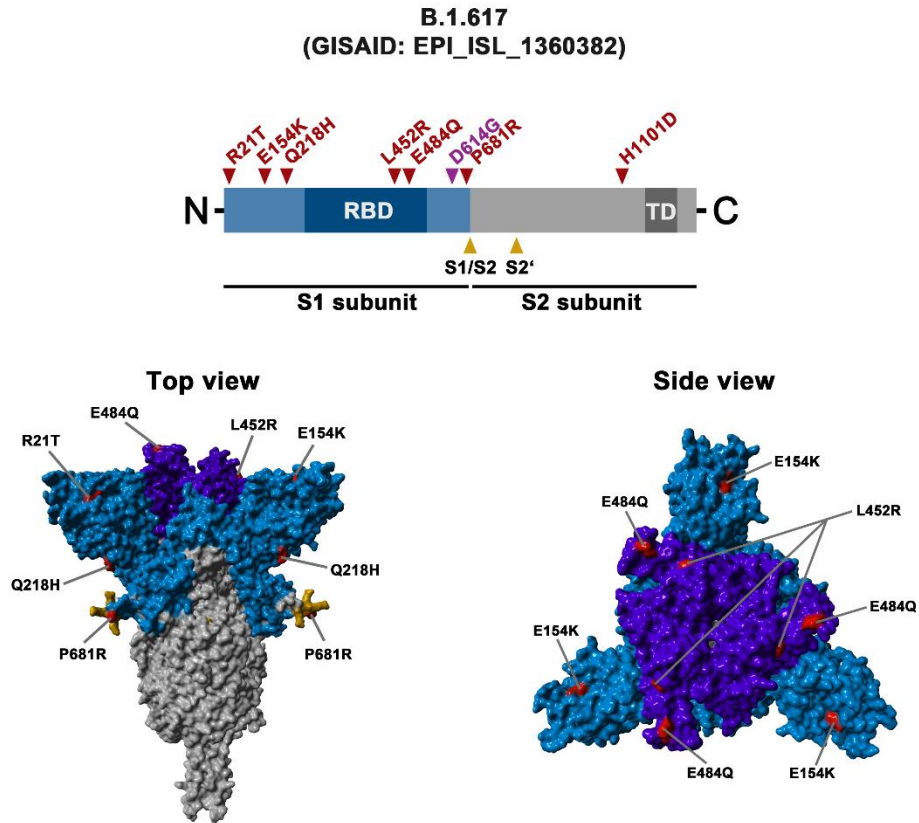



## Figure 2

A)

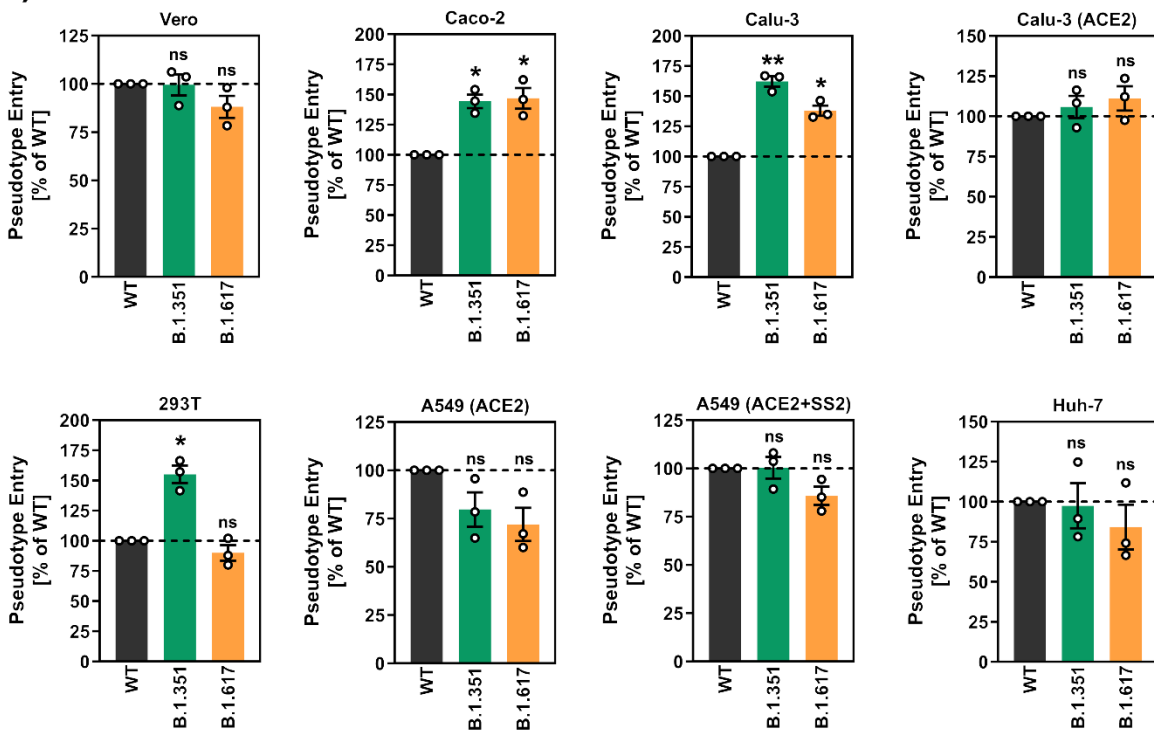

B)

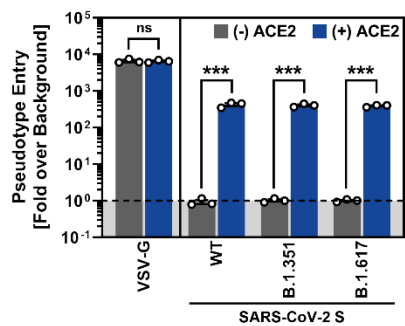

## Figure 3

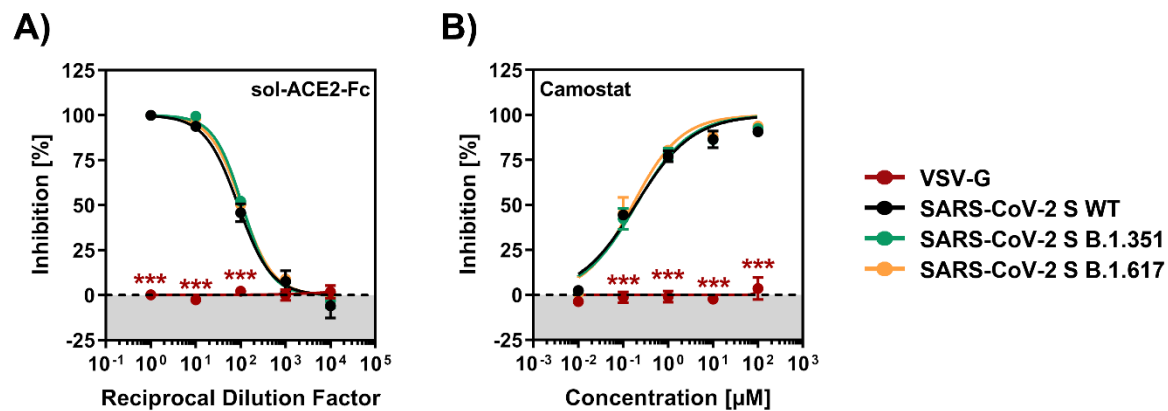

## Figure 4

A)

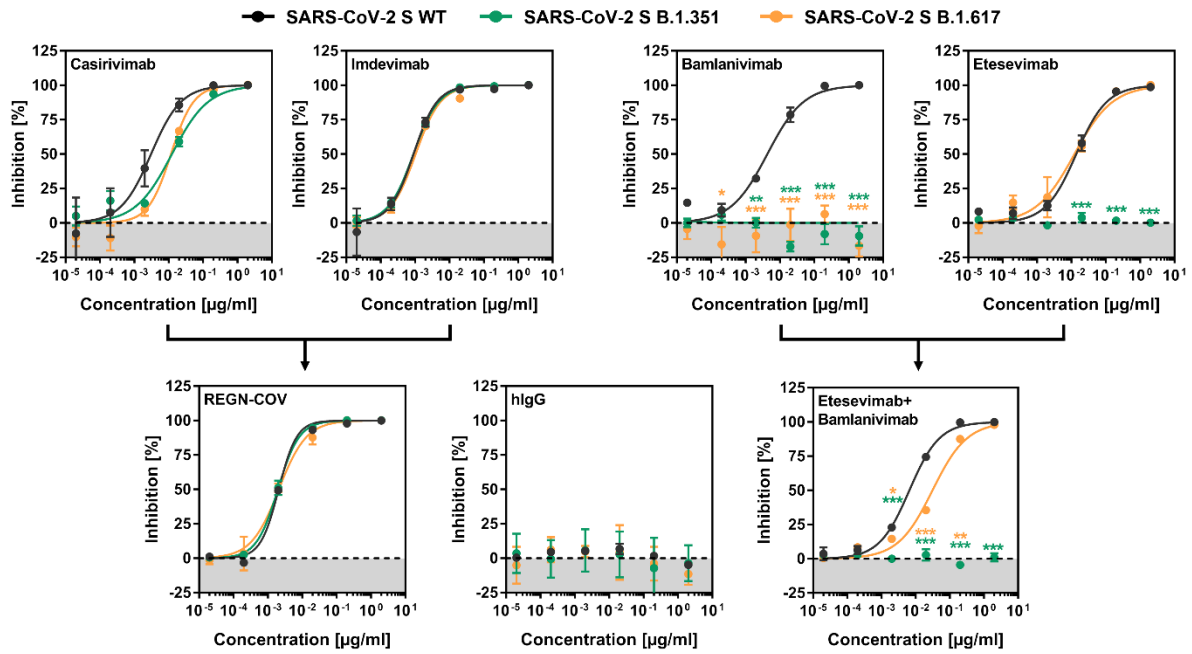

## Figure 5

A)

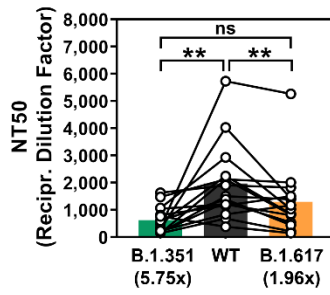

B)

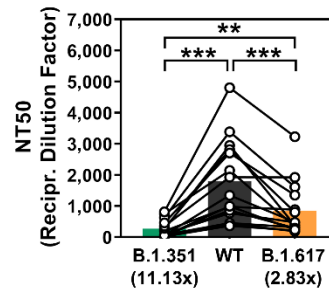

765 **SUPPLEMENTAL INFORMATION**

766 **Figure S1**

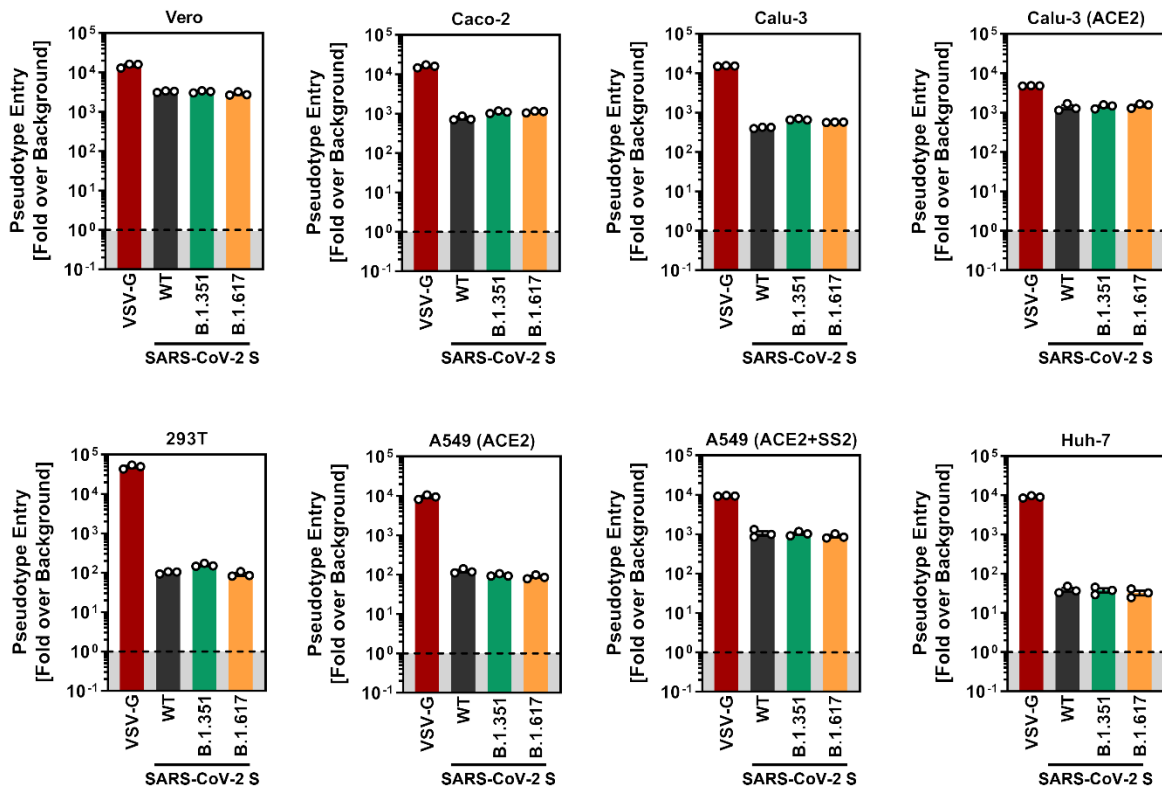

767

768 **Figure S1.** Transduction data normalized against the assay background (related to Figure 2).

769 The experiment was performed as described in the legend of Figure 1A. Presented are the average  
770 (mean) data from the same three biological replicates (each conducted with technical  
771 quadruplicates) as presented in Figure 1A with the difference that this time transduction was  
772 normalized against signals obtained from cells inoculated with particles bearing no viral  
773 glycoprotein (background, set as 1). Further, transduction data of particles bearing VSV-G are  
774 included. Error bars indicate the SEM.

775 **Figure S2**

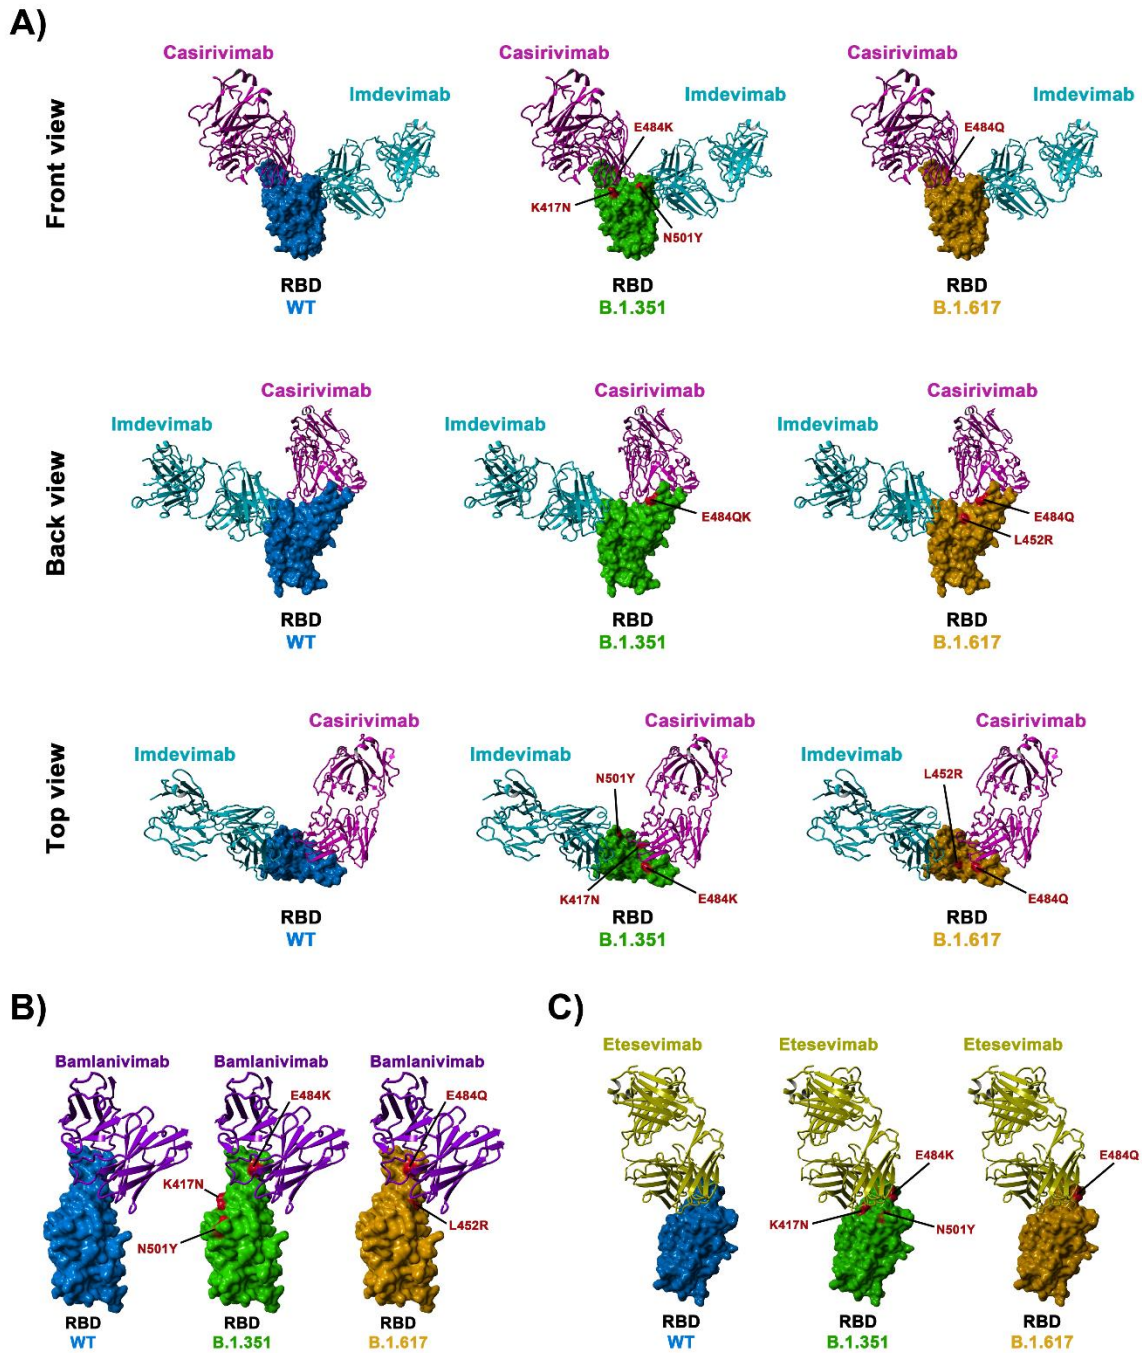

776

777 **Figure S2.** Location of SARS-2-S B.1.351 and B.1.617 RBD mutations with respect to the binding

778 interface of Casirivimab and Imdevimab (A), Bamlanivimab (B) and Esetevimab (C) (related to

779 Figure 4).

780 The protein models of the SARS-2-S receptor-binding domain (RBD, blue) in complex with  
781 antibodies Casirivimab (pink) and Imdevimab (turquoise) were constructed based on the 6XDG  
782 template (Hansen et al., 2020), while the protein models of the SARS-2-S RBD in complex with  
783 antibody Bamlanivimab (purple) and Etesevimab (yellow) were based on the PDB: 7L3N (Jones  
784 et al., 2020) and PDB: 7C01 (Shi et al., 2020) template, respectively. Residues highlighted in red  
785 indicate amino acid variations found in the SARS-CoV-2 variants.



786 **Figure S3**

**A)**

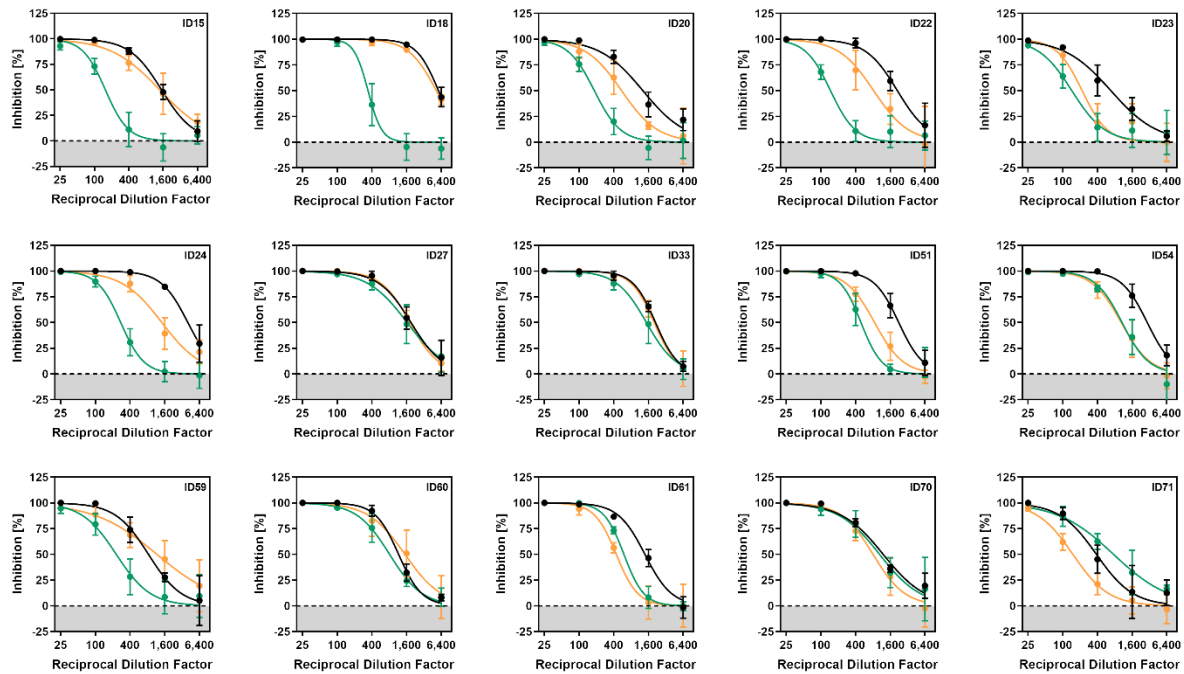

**B)**

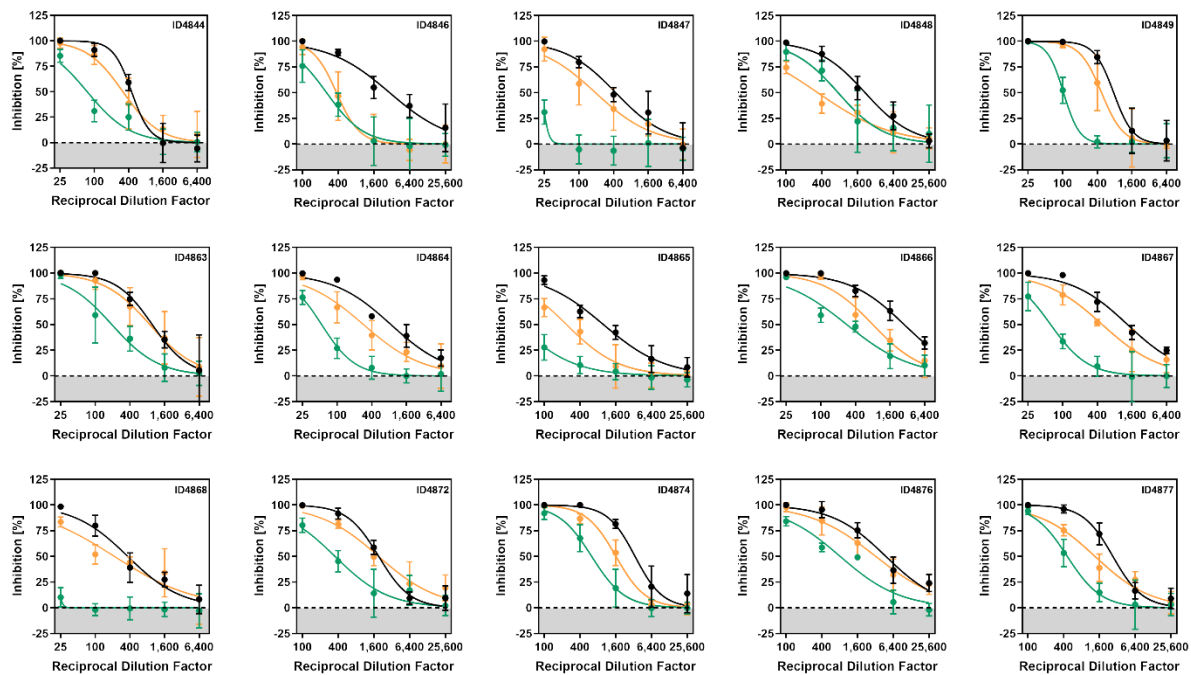

787

788 **Figure S3. Individual neutralization data (related to Figure 5).**

789 Pseudotypes bearing the indicated S proteins were incubated (30 min, 37 °C) with different  
790 dilutions of plasma derived from COVID-19 patients (A) or individuals vaccinated with the  
791 Pfizer/BioNTech vaccine Comirnaty/BNT162b2 (B) and inoculated onto Vero target cells.  
792 Transduction efficiency was quantified by measuring virus-encoded luciferase activity in cell  
793 lysates at 16-18 h posttransduction. Presented are the data from a single representative experiment  
794 conducted with technical Quadruplicates. For normalization, inhibition of S protein-driven entry  
795 in samples without plasma was set as 0 %. Error bars indicate the SD. The data were further used  
796 to calculate the plasma/serum dilution that leads to 50% reduction in S protein-driven cell entry  
797 (neutralizing titer, NT50, shown in Figure 5).

798 **Table S1**

799 **Table S1: COVID-19 patient data**

800

| ID    | Symptoms before hospital admission (days) | Symptoms before ICU admission (days) | WHO classification upon ICU admission |          |        |          | Age | Sex | Diabetes | Hypertension | Cardiac disease | Chronic lung disease + Asthma | Cerebrovascular disease | Chronic kidney disease | Immunosuppression | Cancer | Obesity | Smoking |
|-------|-------------------------------------------|--------------------------------------|---------------------------------------|----------|--------|----------|-----|-----|----------|--------------|-----------------|-------------------------------|-------------------------|------------------------|-------------------|--------|---------|---------|
|       |                                           |                                      | mild                                  | moderate | severe | critical |     |     |          |              |                 |                               |                         |                        |                   |        |         |         |
| SI 15 | ND                                        | ND                                   | -                                     | -        | -      | x        | 65  | M   |          |              | x               |                               |                         |                        |                   | x      |         |         |
| SI 16 | ND                                        | ND                                   | -                                     | x        | -      | x        | 71  | M   |          |              |                 |                               |                         |                        |                   | x      |         |         |
| SI 18 | 2                                         | 11                                   | -                                     | -        | -      | x        | 74  | F   | x        | x            |                 |                               |                         |                        |                   | x      |         |         |
| SI 20 | ND                                        | ND                                   | -                                     | -        | -      | x        | 61  | M   | x        |              |                 | x                             |                         |                        |                   |        |         |         |
| SI 22 | 5                                         | 5                                    | -                                     | -        | -      | x        | 25  | F   |          |              |                 |                               |                         |                        |                   |        | x       |         |
| SI 23 | 2                                         | 8                                    | -                                     | -        | x      | -        | 69  | F   | x        |              |                 |                               |                         |                        |                   |        |         |         |
| SI 24 | 4                                         | 8                                    | -                                     | -        | -      | x        | 61  | M   |          | x            |                 |                               |                         |                        |                   |        |         | x       |
| SI 27 | ND                                        | ND                                   | -                                     | -        | -      | x        | 52  | M   | x        | x            |                 |                               |                         |                        |                   |        |         |         |
| SI 33 | 1                                         | 14                                   | -                                     | -        | -      | x        | 75  | M   | x        | x            | x               |                               |                         |                        |                   |        |         |         |
| SI 51 | 4                                         | 12                                   | -                                     | -        | -      | x        | 71  | M   |          |              |                 |                               |                         |                        |                   |        |         |         |
| SI 54 | 8                                         | 7                                    | -                                     | -        | -      | x        | 58  | F   |          | x            |                 | x                             |                         |                        |                   | x      |         |         |
| SI 59 | 6                                         | 3                                    | -                                     | -        | -      | x        | 46  | M   |          | x            | x               |                               |                         | x                      |                   |        |         | x       |
| SI 60 | 5                                         | 6                                    | -                                     | -        | -      | x        | 61  | F   |          |              |                 | x                             |                         |                        |                   |        |         |         |
| SI 61 | 7                                         | 2                                    | -                                     | -        | -      | x        | 50  | M   |          |              |                 | x                             |                         |                        |                   |        | x       |         |
| SI 70 | ND                                        | ND                                   | -                                     | -        | x      | -        | 34  | F   |          |              |                 |                               |                         |                        |                   |        |         |         |
| SI 71 | 5                                         | 3                                    | -                                     | x        | -      | -        | 54  | M   |          | x            |                 |                               |                         |                        |                   |        |         |         |

801

802 ND =Not determined

803 **Table S2**

804 **Table S2.** BNT162b2-vaccinated patient data.

805  
806 BNT162b2-vaccinated patient data. Serological data shows antibody titer against spike (IgG)  
807 protein determined by quantitative ELISA (SARS-CoV-2-QuantiVac; Euroimmun, Lübeck,  
808 Germany) according to the manufacturer's instructions. Antibody levels are expressed as RU/ml  
809 assessed from a calibration curve with values above 10 RU/mL defined as positive, values beyond  
810 the standard curve are expressed as >120 RU/ml.

811

| ID   | Age (y) | Gender | Time since 2 <sup>nd</sup> vaccination (d) | Spike-IgG |
|------|---------|--------|--------------------------------------------|-----------|
| 4844 | 47      | f      | 31                                         | >120      |
| 4846 | 28      | f      | 29                                         | >120      |
| 4847 | 57      | f      | 26                                         | >120      |
| 4848 | 29      | m      | 26                                         | >120      |
| 4849 | 39      | m      | 24                                         | >120      |
| 4863 | 58      | f      | 26                                         | >120      |
| 4864 | 53      | f      | 26                                         | >120      |
| 4865 | 57      | m      | 25                                         | >120      |
| 4866 | 59      | f      | 29                                         | >120      |
| 4867 | 52      | f      | 30                                         | 34,4      |
| 4868 | 56      | f      | 30                                         | 119.6     |
| 4872 | 37      | f      | 25                                         | >120      |
| 4874 | 26      | f      | 29                                         | >120      |
| 4876 | 27      | f      | 30                                         | >120      |
| 4877 | 29      | f      | 28                                         | >120      |

812
